# Supplementary material for: Formation of calcium phosphate nanoparticles mediated by animal protein hydrolysates enhances calcium absorption by murine small intestineex vivo
Source: Royal Society of Chemistry journal article supplement (doi:10.1039/c9fo01273g), 2019-01-01
Supplement: c9fo01273g1.pdf [file c9fo01273g1.pdf]

## Supporting Information

### **Formation of Calcium Phosphate Nanoparticles Mediated by Animal Protein Hydrolysates Enhances Calcium Absorption by Murine Small Intestine Ex Vivo**

Yisheng Yang <sup>a</sup>, Suqin Zhu <sup>a</sup>, Wei Guo <sup>a</sup>, Yinong Feng <sup>a</sup>, Tengjiao Guo <sup>a</sup>, Haohao Wu

<sup>a</sup>\*

<sup>a</sup> *College of Food Science and Engineering, Ocean University of China, 5 Yushan  
Road, Qingdao, Shandong Province, 266003, China*

\*The corresponding author. Fax: +86 0532 82032400; E-mail address:

[wuhaohao@ouc.edu.cn](mailto:wuhaohao@ouc.edu.cn)

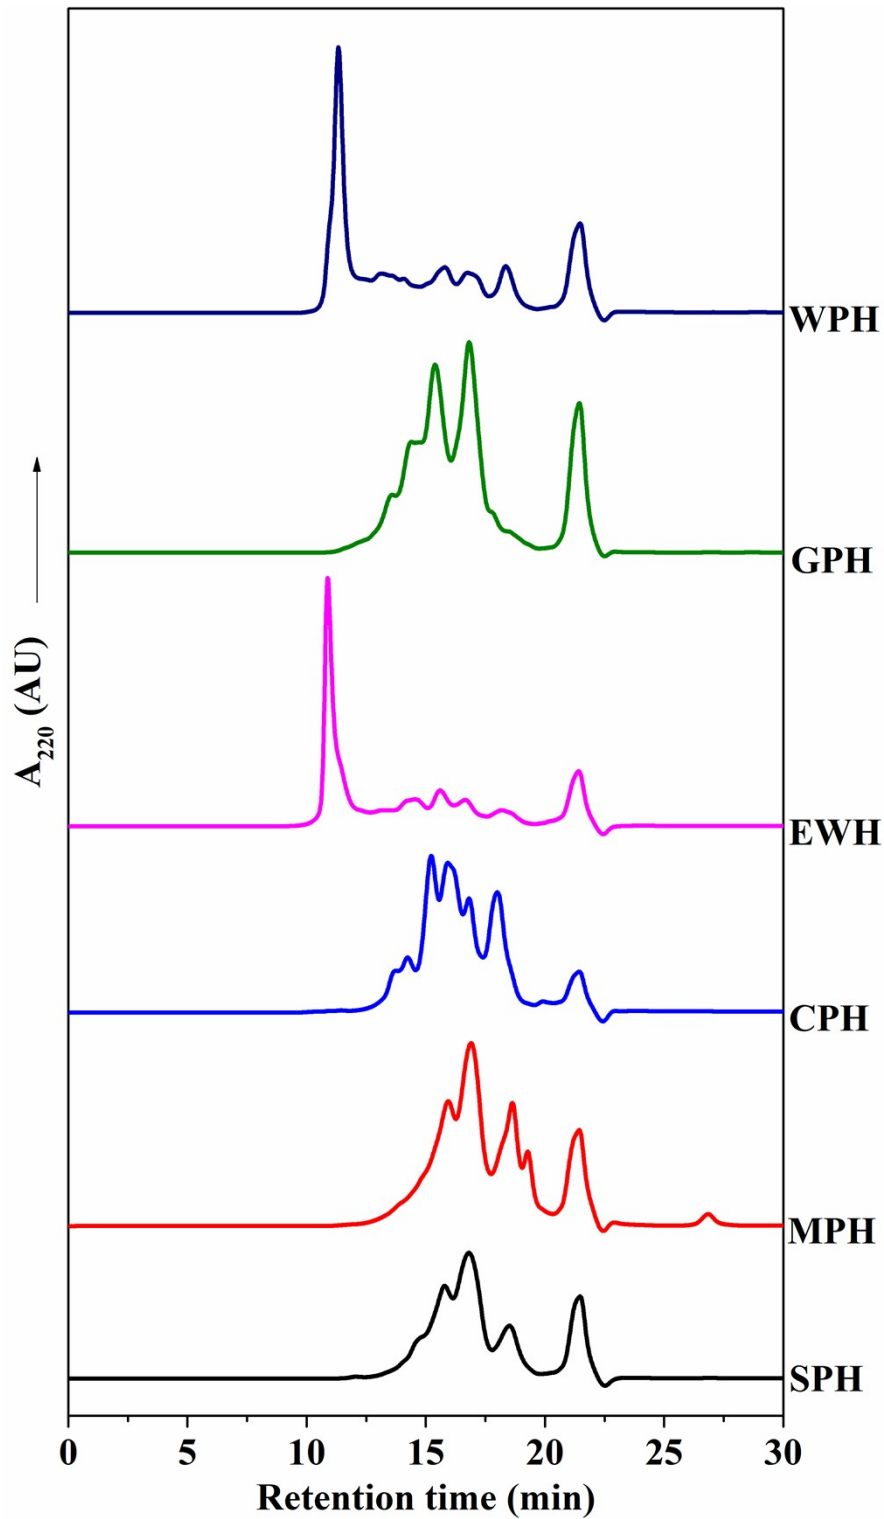

**Figure S1.** Gel chromatography traces of animal protein hydrolysates. Abbreviations: CPH, casein protein hydrolysate; EWH, egg white hydrolysate; GPH, gelatin protein hydrolysate; MPH, myofibrillar protein hydrolysate; SPH, sarcoplasmic protein hydrolysate; WPH, whey protein hydrolysate.
